# Supplementary material
Source: PubMed Central journal article supplement (PMC5324780)
Supplement: NIHMS842900-supplement-1.pdf [file NIHMS842900-supplement-1.pdf]

# Supplemental Figure 1

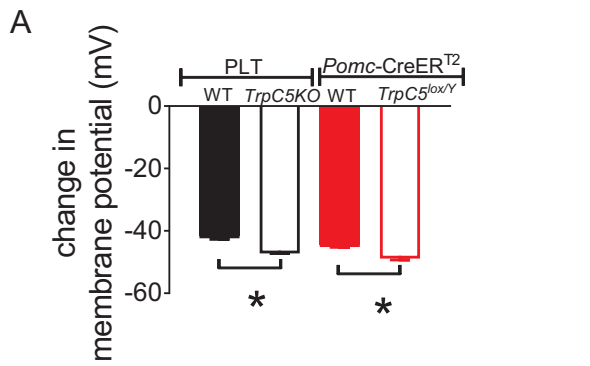

**B** *Pomc-CreER::TrpC5<sup>lox/Y</sup>::tdtomato*

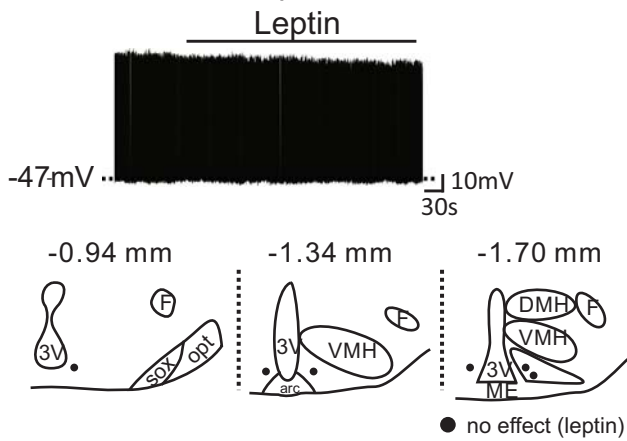

**C** *Pomc-CreER::TrpC5<sup>lox/Y</sup>::tdtomato*

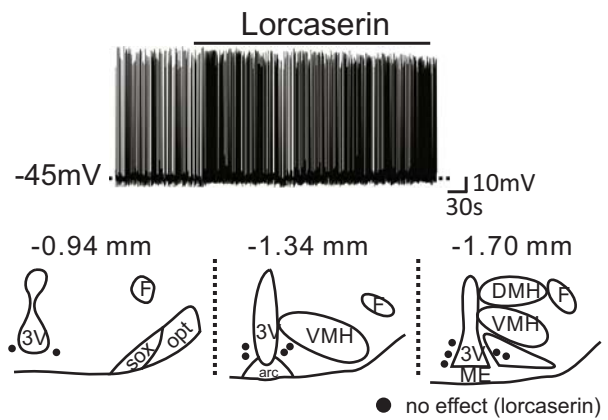

**D** Acute effects of lorcaserin on *TrpC5* negative *Pomc* neurons

|                   | Hyperpolarized | Depolarized | No response |
|-------------------|----------------|-------------|-------------|
| Lorcaserin (n=11) | 0(0%)          | 0(0%)       | 11(100%)    |
| Leptin (n=6)      | 0(0%)          | 0(0%)       | 6(100%)     |

## Supplemental Figure 2

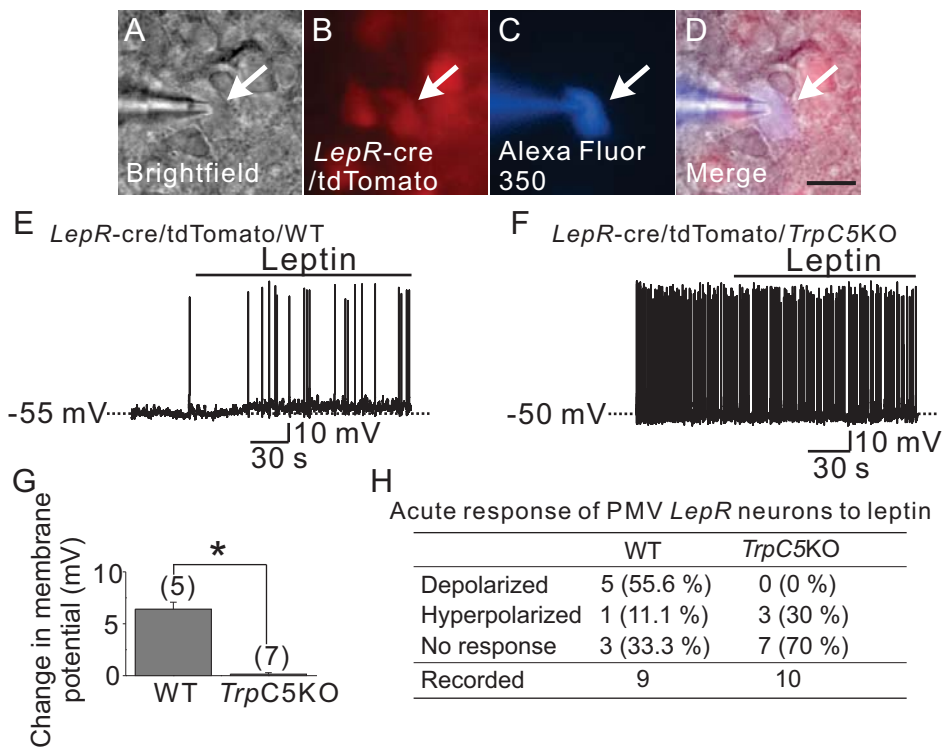

# Supplemental Figure 3

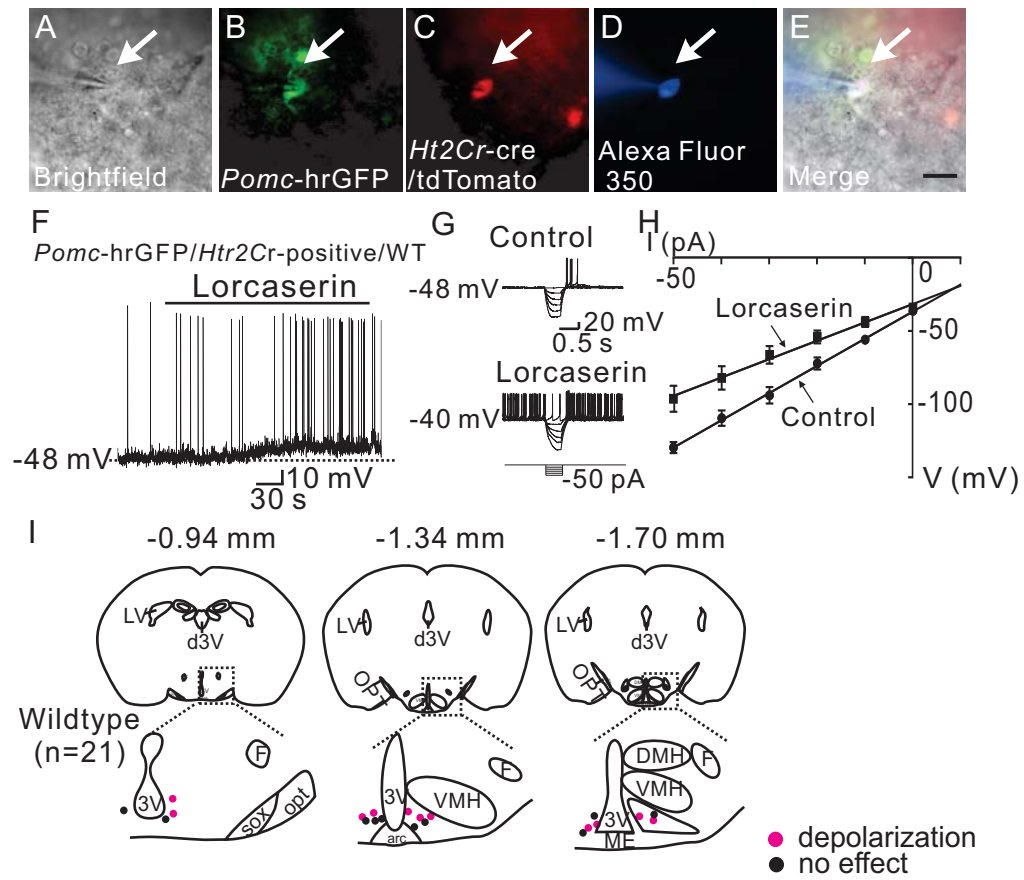

# Supplemental Figure 4

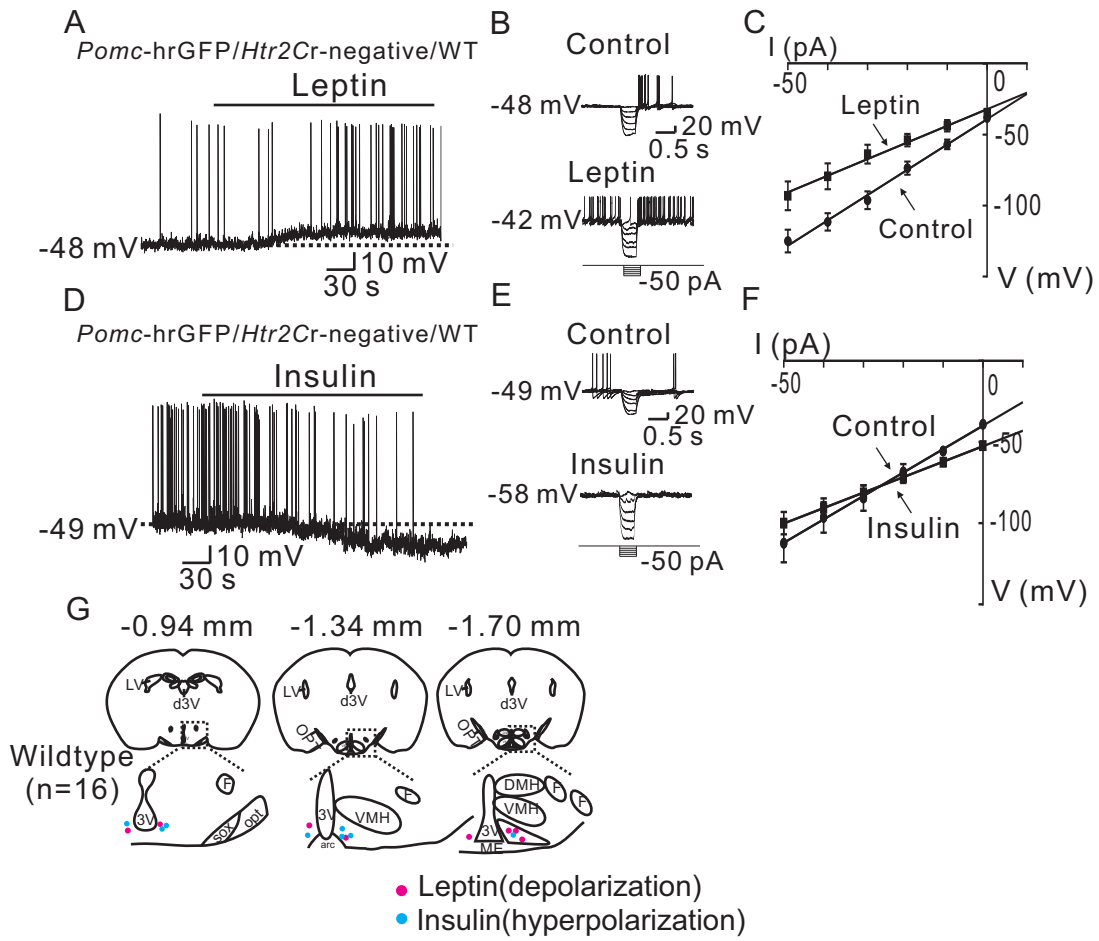

# Supplemental Figure 5

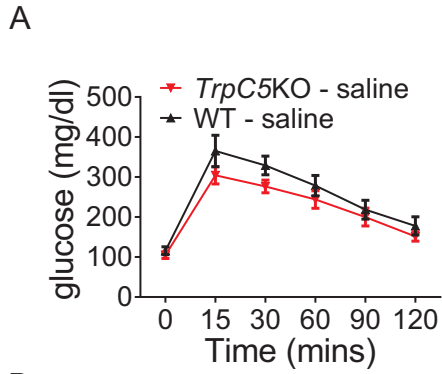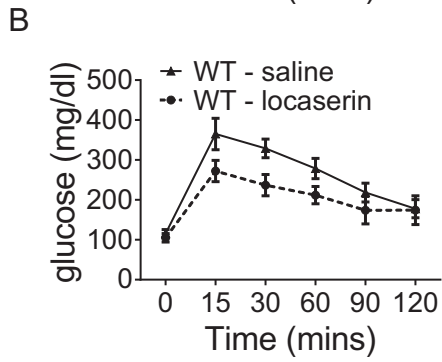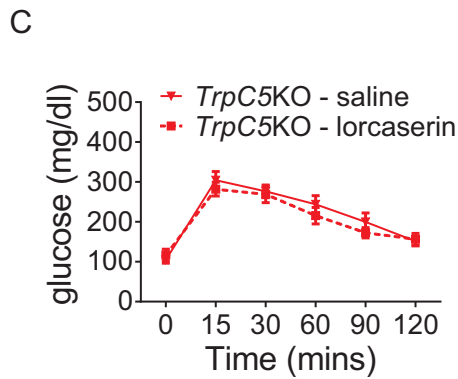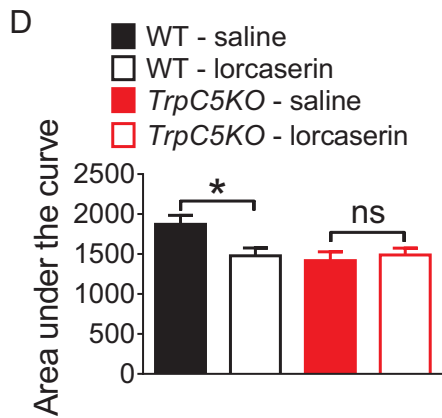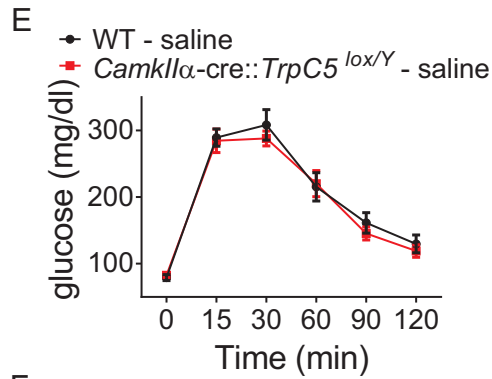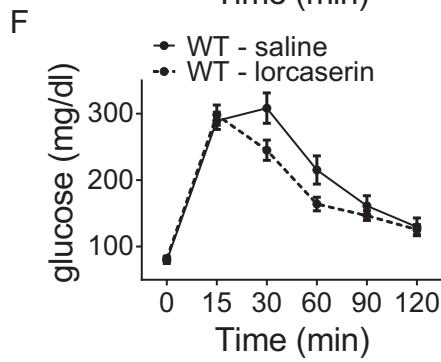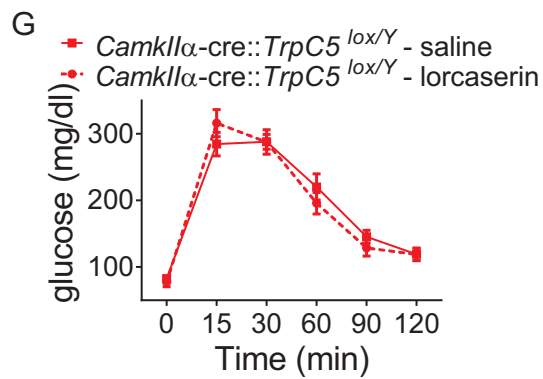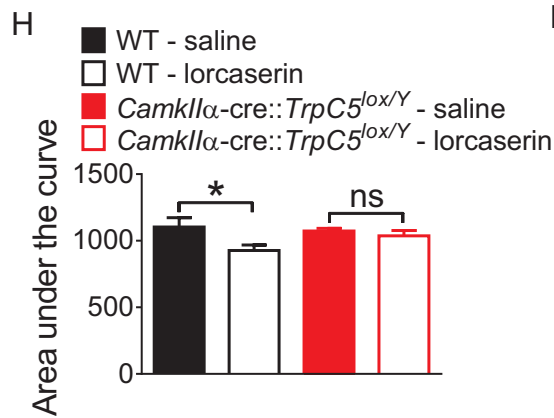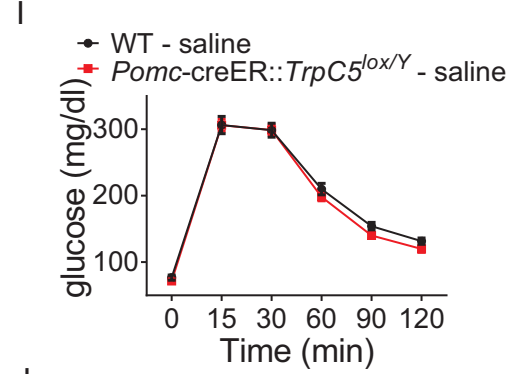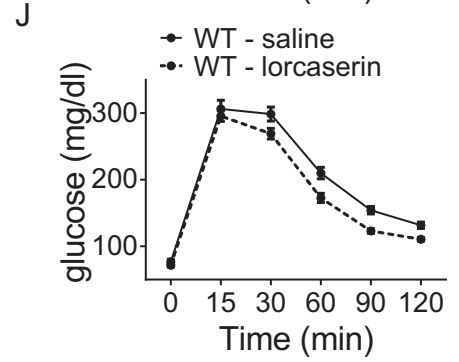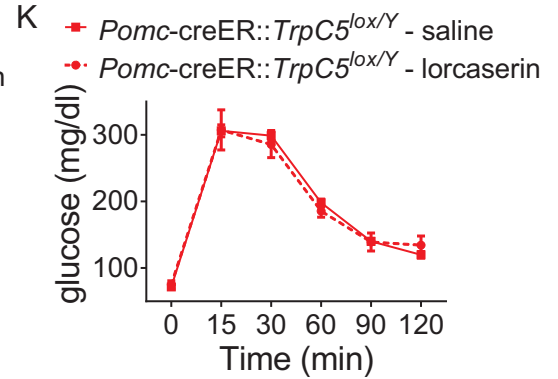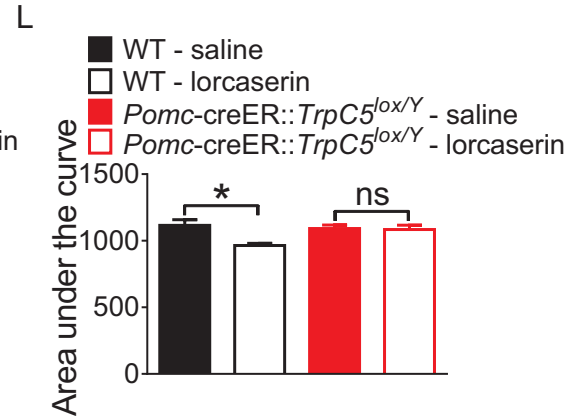

# Supplemental Figure 6

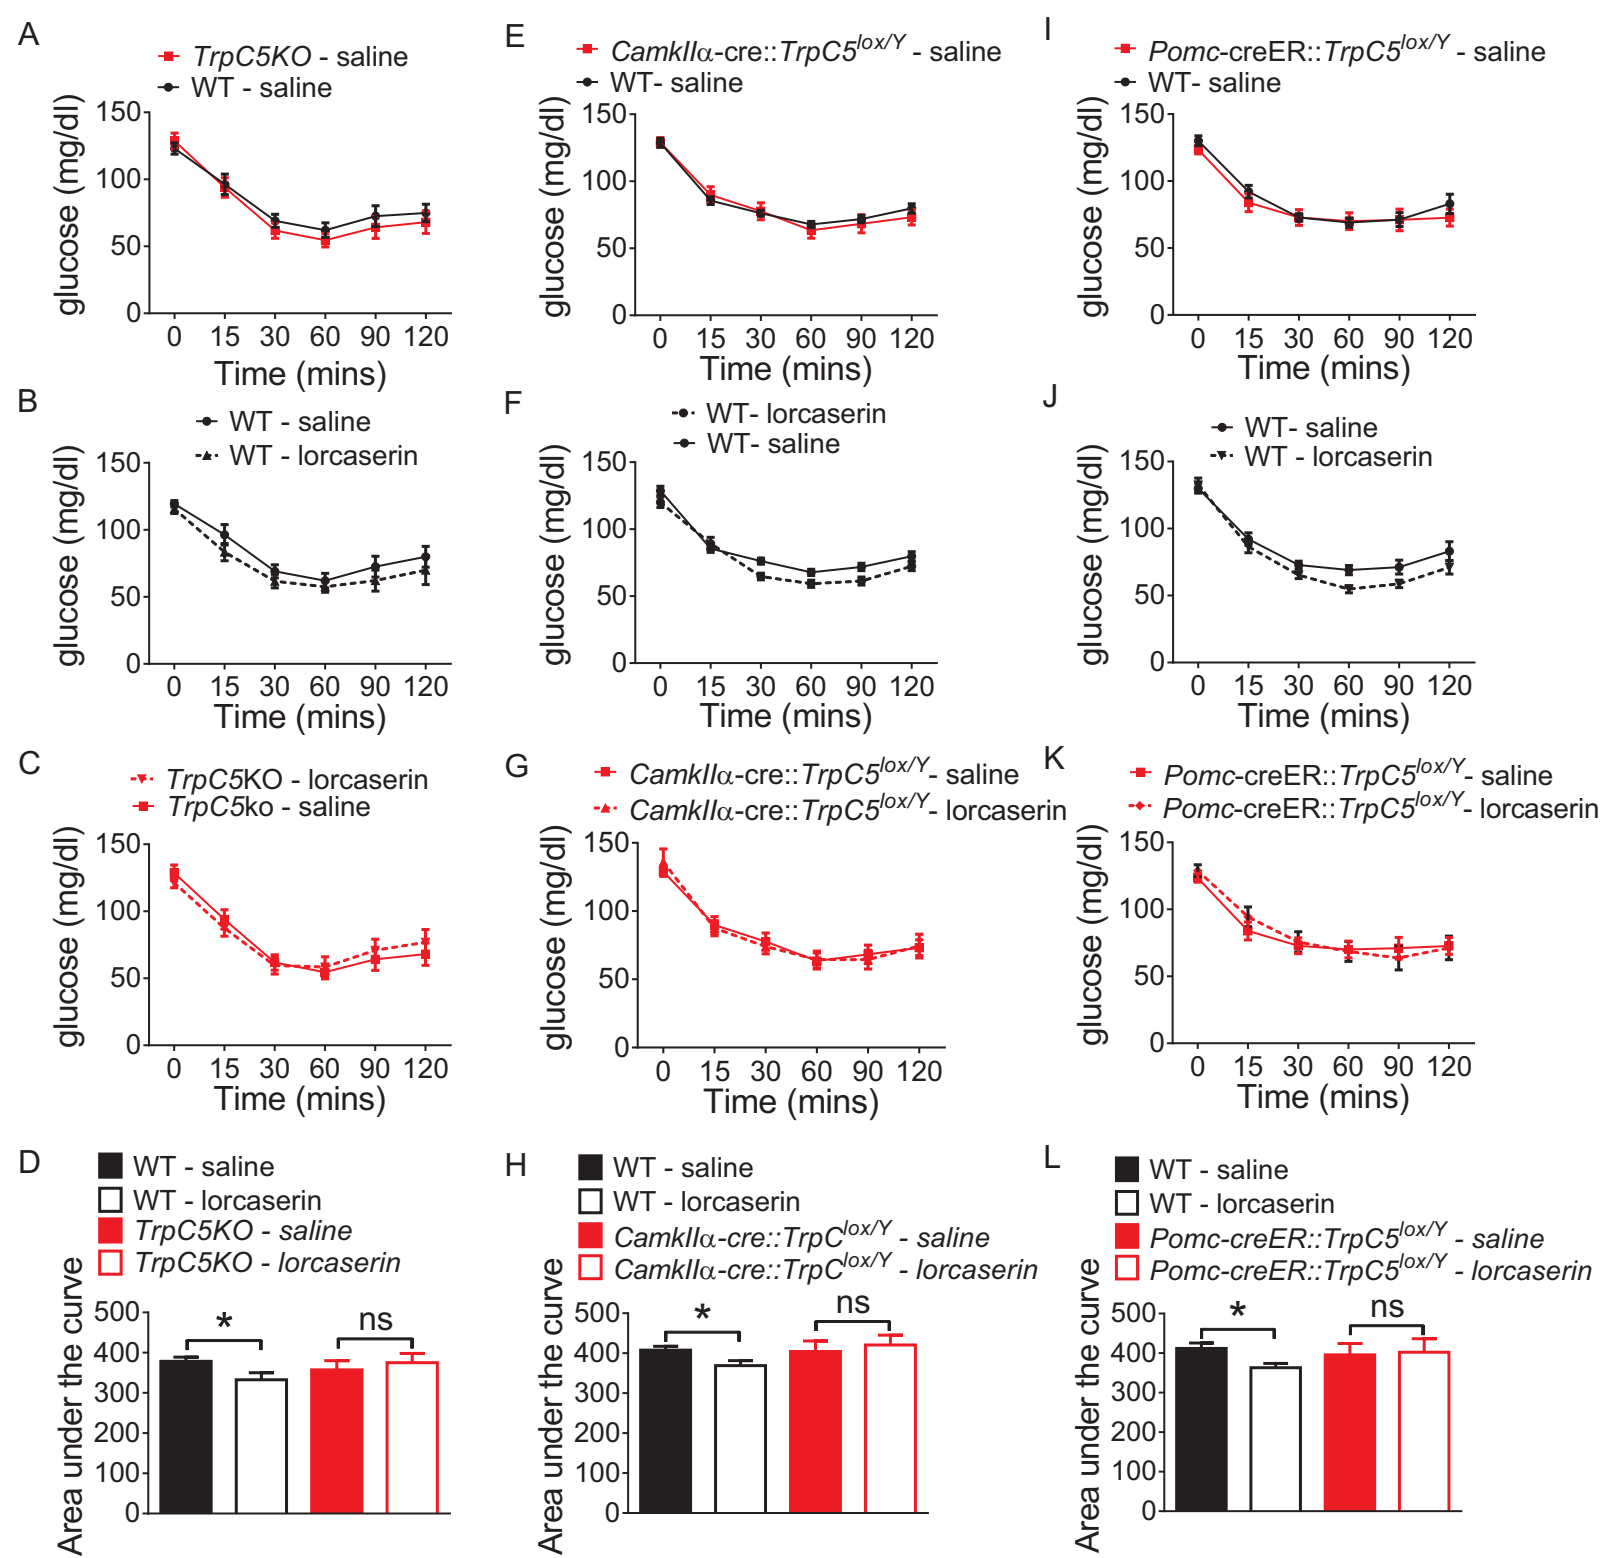

## Supplemental Table 1

### *Pomc*-hrGFP::*LepR*-cre-tdtomato (PLT) mice

| Action Potential Frequency  |              | Resting Membrane Potential  |                |
|-----------------------------|--------------|-----------------------------|----------------|
| <b>Leptin Treatment</b>     |              | <b>Leptin Treatment</b>     |                |
| Before Leptin               | 2.3 ± 0.9 Hz | Before Leptin               | -46.1 ± 2.1 mV |
| After Leptin                | 5.6 ± 1.1 Hz | After Leptin                | -40.2 ± 1.5 mV |
| <b>Lorcaserin Treatment</b> |              | <b>Lorcaserin Treatment</b> |                |
| Before Lorcaserin           | 2.4 ± 0.4 Hz | Before Lorcaserin           | -45.6 ± 1.1 mV |
| After Lorcaserin            | 7.3 ± 1.6 Hz | After Lorcaserin            | -40.4 ± 0.8 mV |
| <b>mCPP Treatment</b>       |              | <b>mCPP Treatment</b>       |                |
| Before mCPP                 | 2.0 ± 0.6 Hz | Before mCPP                 | -44.8 ± 1.2 mV |
| After mCPP                  | 4.1 ± 0.5 Hz | After mCPP                  | -38.5 ± 1.3 mV |

## Supplemental Table 2

### *Pomc*-hrGFP::*LepR*-cre-tdtomato-*TrpC5*KO (PLT5KO) mice

| Action Potential Frequency  |              | Resting Membrane Potential  |                |
|-----------------------------|--------------|-----------------------------|----------------|
| <b>Leptin Treatment</b>     |              | <b>Leptin Treatment</b>     |                |
| Before Leptin               | 1.8 ± 1.1 Hz | Before Leptin               | -49.5 ± 1.1 mV |
| After Leptin                | 2.2 ± 0.8 Hz | After Leptin                | -48.3 ± 1.0 mV |
| <b>Lorcaserin Treatment</b> |              | <b>Lorcaserin Treatment</b> |                |
| Before Lorcaserin           | 1.9 ± 0.5 Hz | Before Lorcaserin           | -48.7 ± 1.8 mV |
| After Lorcaserin            | 2.3 ± 0.9 Hz | After Lorcaserin            | -49.1 ± 1.7 mV |
| <b>mCPP Treatment</b>       |              | <b>mCPP Treatment</b>       |                |
| Before mCPP                 | 1.6 ± 0.6 Hz | Before mCPP                 | -48.3 ± 1.4 mV |
| After mCPP                  | 2.3 ± 0.9 Hz | After mCPP                  | -48.2 ± 1.5 mV |



### Supplemental Table 3

#### *Pomc::Ht2Cr-cre::tdtomato* (P2CT) mice

| Action Potential Frequency  |              | Resting Membrane Potential  |                |
|-----------------------------|--------------|-----------------------------|----------------|
| <b>Leptin Treatment</b>     |              | <b>Leptin Treatment</b>     |                |
| Before Leptin               | 2.3 ± 0.6 Hz | Before Leptin               | -46.2 ± 2.0 mV |
| After Leptin                | 2.6 ± 0.7 Hz | After Leptin                | -46.0 ± 2.4 mV |
| <b>Lorcaserin Treatment</b> |              | <b>Lorcaserin Treatment</b> |                |
| Before Lorcaserin           | 1.9 ± 1.0 Hz | Before Lorcaserin           | -46.0 ± 1.3 mV |
| After Lorcaserin            | 5.6 ± 1.3 Hz | After Lorcaserin            | -37.8 ± 1.1 mV |

## Supplemental Table 4

### *Pomc-creER<sup>T2</sup>::tdtomato* mice

| Action Potential Frequency |              | Resting Membrane Potential |                |
|----------------------------|--------------|----------------------------|----------------|
| Leptin Treatment           |              | Leptin Treatment           |                |
| Before Leptin              | 2.1 ± 1.0 Hz | Before Leptin              | -45.3 ± 1.9 mV |
| After Leptin               | 6.0 ± 0.8 Hz | After Leptin               | -39.0 ± 1.3 mV |
| Lorcaserin Treatment       |              | Lorcaserin Treatment       |                |
| Before Lorcaserin          | 2.0 ± 0.5 Hz | Before Lorcaserin          | -46.0 ± 2.0 mV |
| After Lorcaserin           | 6.1 ± 1.1 Hz | After Lorcaserin           | -40.7 ± 1.1 mV |

### *Pomc-creER<sup>T2</sup>::tdtomato::TrpC5<sup>lox/Y</sup>* mice

| Action Potential Frequency |              | Resting Membrane Potential |                |
|----------------------------|--------------|----------------------------|----------------|
| Leptin Treatment           |              | Leptin Treatment           |                |
| Before Leptin              | 1.5 ± 0.8 Hz | Before Leptin              | -49.2 ± 2.9 mV |
| After Leptin               | 2.0 ± 0.9 Hz | After Leptin               | -48.9 ± 3.5 mV |
| Lorcaserin Treatment       |              | Lorcaserin Treatment       |                |
| Before Lorcaserin          | 1.9 ± 0.8 Hz | Before Lorcaserin          | -48.8 ± 1.1 mV |
| After Lorcaserin           | 1.8 ± 0.8 Hz | After Lorcaserin           | -48.6 ± 1.5 mV |
